# Supplementary material for: Calculating the vertical column density of O 4 during daytime from surface values of pressure, temperature, and relative humidity
Source: Copernicus journal article supplement (doi:10.5194/amt-15-987-2022), 2022-02-24
Supplement: Supplementary file 1 [file amt-15-987-2022-supplement.zip]

Archive with 2 entries (2 files):
- amt-15-987-2022-supplement-title-page.pdf
- python_functions.py
