# Supplementary material for: Calculating the vertical column density of O 4 during daytime from surface values of pressure, temperature, and relative humidity
Source: Copernicus journal article supplement (doi:10.5194/amt-15-987-2022), 2022-02-24
Supplement: Supplementary file 1 [file amt-15-987-2022-supplement.zip › amt-15-987-2022-supplement-title-page.pdf]

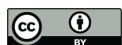

## *Supplement of*

# **Calculating the vertical column density of O<sub>4</sub> during daytime from surface values of pressure, temperature, and relative humidity**

**Steffen Beirle et al.**

*Correspondence to:* Steffen Beirle ([steffen.beirle@mpic.de](mailto:steffen.beirle@mpic.de))

- [amt-15-987-2022-supplement-title-page.pdf](#)
- [python\\_functions.py](#)

The copyright of individual parts of the supplement might differ from the article licence.
